# Supplementary material
Source: publisher figshare collection journal article supplement (https://geolsoc.figshare.com/ndownloader/files/5425445)
Supplement: Supplementary file 1 [file 5425445]

Table 1. Representative chemical analysis of the anorthositic suite and related mafic dykes
from Sierra de Maz and Sierra del Espinal
				Anorthositic Suite				Mafic dyke
Samples	ESP-7056	MAZ-7207	MAZ-7208	MAZ-7209	MAZ-7215	MAZ-7211	MAZ-7216	MAZ-7210
Major oxides (wt%)
SiO2	52.89	53.92	54.22	55.37	53.99	52.88	51.20	42.53
Al2O3	27.16	25.85	26.34	26.68	27.16	24.28	25.52	14.41
Fe2O3	0.21	0.30	0.64	0.44	0.12	0.40	3.38	3.62
FeO	2.01	1.22	0.83	0.57	0.70	3.65		15.78
MnO	0.03	0.03	0.03	0.01	0.01	0.07	0.04	0.34
MgO	0.85	0.22	0.16	0.11	0.10	0.87	2.84	3.22
CaO	10.83	9.34	10.25	10.01	10.43	8.75	9.69	12.19
Na2O	4.45	5.15	5.08	5.19	5.15	4.92	4.50	0.64
K2O	0.48	1.49	0.42	0.58	0.54	1.28	0.45	0.65
TiO2	0.34	0.18	0.19	0.12	0.14	1.13	0.22	2.98
P2O5	0.06	0.12	0.07	0.05	0.06	0.37	0.04	1.72
LOI	0.57	1.84	0.57	0.70	1.37	1.29	1.89	-0.24
TOTAL	99.88	99.66	98.80	99.83	99.77	99.89	99.77	97.85
Trace elements (ppm)
Cs	0.34	1.28	-0.10	0.16	0.68	0.77	1.14	0.10
Rb	3.97	34.88	1.21	2.22	7.40	30.37	9.25	1.74
Sr	742	804	840	806	870	816	854	81
Ba	196	297	163	252	214	301	126	78
La	4.28	7.25	6.92	4.92	3.84	9.23	4.56	65.9
Ce	9.17	13.6	13.7	8.64	7.57	20.5	8.70	165
Pr	0.89	1.55	1.55	0.91	0.86	2.63	0.97	23.1
Nd	3.81	6.33	6.26	3.50	3.58	12.0	3.83	111
Sm	0.67	1.16	1.16	0.57	0.68	2.56	0.69	25.1
Eu	1.56	2.06	1.33	2.22	1.21	2.25	0.801	7.19
Gd	0.58	1.01	1.01	0.44	0.58	2.39	0.60	24.2
Tb	0.08	0.15	0.14	0.06	0.09	0.36	0.09	3.86
Dy	0.43	0.74	0.73	0.30	0.47	1.85	0.50	20.0
Ho	0.08	0.15	0.14	0.06	0.10	0.37	0.10	3.98
Er	0.22	0.39	0.36	0.15	0.25	0.97	0.30	10.4
Tm	b.d.	0.053	0.048	b.d.	0.036	0.116	0.042	1.42
Yb	0.19	0.33	0.30	0.12	0.23	0.77	0.29	8.15
Lu	0.025	0.050	0.041	0.017	0.032	0.118	0.047	1.19
U	0.03	0.02	0.03	0.01	0.03	0.04	0.15	0.26
Th	0.19	0.05	0.10	-0.05	0.15	0.13	0.35	0.71
Y	2.1	3.9	3.6	1.5	2.4	10.1	2.9	102
Nb	2.8	8.4	5.1	2.8	5.3	14.6	4.9	47.0
Zr	10	10	19	5	14	34	114	247
Hf	0.3	0.3	0.4	0.1	0.4	0.7	1.8	6.9
Ta	0.04	0.14	0.12	0.04	0.05	0.56	0.20	2.63
Ga	20	20	18	21	17	18	15	21
Ge	0.8	0.8	0.8	0.7	0.7	0.9	0.6	2.1
Co	7	b.d.	b.d.	b.d.	b.d	7	16	16
Cr	b.d.	b.d.	b.d.	b.d.	b.d	b.d	56	b.d
REE	21.97	34.84	33.64	21.91	19.53	56.11	21.54	470.36
Eu/Eu*	7.7	5.8	3.7	13.4	5.9	2.8	3.8	0.89
Radiogenic isotopes
eSr	20	28	23	26	14	39	13	13
eNd	-0.3	1.6	0.1	0.8	-1.2	1.2	3.4	3.0
TDM	1.46	1.3	1.42	1.4	1.51	1.37	1.18	1.24
b.d., below detection limit
